# Supplementary material
Source: Research Square preprint supplement (doi:10.21203/rs.3.rs-8763955/v1)
Supplement: Supplementary file 1 [file 86d342fbc972199094a3f2e3.docx]

**Supplementary material**

**FGD guide**

Focused Group Discussion (FGD) guide on “Additional public health competencies required by public health graduates to handle public health emergency of international concern.”

**Context**

The Model Curriculum Handbook by the MoHFW, Government of India for Masters in Public Health (MPH), and the ASPH, USA, have enlisted core competencies in epidemiology, biostatistics, environmental and occupational health, health systems and policy analysis, and social and behavioral sciences domains.

The advent of COVID-19 has brought about a change in how public health professionals are perceived with respect to their competencies in delivering primary healthcare services. In this regard, we solicit your opinion regarding the additional competencies that an MPH graduate should have.

The specific research question that we seek inputs is: What are the Additional public health competencies required by public health graduates to handle public health emergency of international concern**?**

I now open the floor for opening remarks from each one of you

***Probes***

1. Advocacy

2. Communication

3. Lobby

4. IT savvy

5. Knowledge generation to knowledge translation

6. Media engagement

7. Systems thinking

**Exit Questions:**

1. Is there anything else that you would like to add to your conversation about this topic?
2. Has any topic or issue not been addressed during the conversation?
3. Is there any specific topic you want to circle from this discussion to add to or expand on?
